47 These two studies provide evidence that keeping a 24h free-running period positively affects  
48 lifespan. However, the underlying mechanisms that would explain the disadvantages of a  
49 desynchrony between *tau* and external light-dark cycles remain totally unknown. An assumption  
50 advanced is that daily marginal metabolic or physiological costs, required by the clock daily  
51 entrainment, would accumulate over life and with time, impact negatively longevity, according to the  
52 rate of living theory. Postulated by Pearl (1928), this theory states that longevity of an organism is  
53 conditioned by its rate of metabolism. Our study aimed at determining if these daily costs could be  
54 detected and quantified.

55 To address this issue, we focused on a non-human primate, the gray mouse lemur (*Microcebus*  
56 *murinus*). This small Malagasy lemur is an emerging model in neurosciences since it displays aged-  
57 related impairments similar to those found in humans (e.g. spontaneous neurodegenerative diseases  
58 or cognitive deficiencies, Bons et al., 2006; Joly et al., 2014; Languille et al., 2012; Picq et al., 2015),  
59 including circadian rhythms alteration, such as locomotor activity fragmentation or sleep  
60 deterioration (see Hozer et al., 2019 for review). On the other hand, its small body size and light body  
61 mass make it an ideal and promising laboratory model. Regarding circadian features, the gray mouse  
62 lemur is strictly nocturnal and its metabolism is highly dependent on photoperiod (Génin and Perret,  
63 2000). Its mean free-running period lies around 23.5h (Cayetanot et al., 2005).

64 We submitted mouse lemurs to two different photoperiodic regimens, mimicking a standard  
65 deviation of *tau* (individuals kept in light-dark cycles of 24h) and a great deviation of *tau* (individuals  
66 kept in light-dark cycles of 26h). We considered that clock daily entrainment may exert a direct or  
67 indirect influence on physiological and metabolic functions, particularly on basal metabolic activity,  
68 which might affect longevity. We thus focused on several factors that reflect this basal metabolism  
69 (e.g. oxygen respiration, energy expenditure, body temperature, oxidative stress...) and measured  
70 them before and after photoperiodic treatments. Knowing that the circadian clock substantially  
71 influences cognitive performances (Kyriacou and Hastings, 2010), we were also wondering if daily  
72 synchronization costs could affect cerebral abilities. We hence assessed cognitive performances using  
73 a learning-task based on visual discrimination.

74

## 75 Results

76

### 77 1) Baseline before treatment

78

79 Baseline parameters are shown in Table 1. No difference was detected between the two groups  
80 before treatments. All values (except for oxidative stress) are averaged over the five first days before  
81 treatment.

82

### 83 2) Effects of photoperiodic treatments on locomotor activity and body temperature

84

85 T24 and T26 animals responded properly to their respective photoperiodic treatments (locomotor  
86 activity mean periods of  $23.99 \pm 0.01$  and  $25.99 \pm 0.04$  respectively), since they were correctly  
87 entrained to the light-dark cycles they were submitted to ( $t_{T24} = -2.53$ ,  $p_{T24} = 0.35$ ,  $t_{T26} = -0.75$ ,  $p_{T26} = 0.47$ ;  
88 Fig. 1). The diagrams of temperature (see Supplementary materials S1) present the same patterns  
89 (mean periods of  $24.01 \pm 0.01$  and  $25.98 \pm 0.07$  respectively;  $t_{T24} = 1.83$ ,  $p_{T24} = 0.15$ ;  $t_{T26} = -0.80$ ,  $p_{T26} = 0.44$ ).

90

91 No significant difference was observed in activity levels between T24 and T26 animals (active phase:  
92  $F = 1.08$ ,  $p = 0.32$ ; resting phase:  $F = 0.04$ ,  $p = 0.85$ ; Fig. 2). Regarding body temperature, a rising trend in  
93 T26 was detected only during the resting phase (active phase:  $F = 2.08$ ,  $p = 0.17$ ; resting phase:  $F = 2.99$ ,  
94  $p = 0.11$ ; Fig. 2). When subtracting the thermic fall, *i.e.* considering only  $T_b$  values starting after the  
95 daily minimal  $T_b$  ( $T_{min}$ ) was reached, T26 animals exhibited significantly higher  $T_b$  than T24

96 (+0.32±0.06°C, F=8.63, p=0.009, Fig. 2).  $T_{\min}$  was reached 3.33h and 3.20h after the start of the  
97 resting phase in T24 and T26 animals respectively.

### 98 3) Effects of photoperiodic treatments on calorimetric parameters

100  
101 When considering the active phase,  $VO_2$ ,  $VCO_2$  and Heat levels were not significantly different  
102 between treatments (F=0.33, p=0.58; F=0.06, p=0.82; F=0.62, p=0.44 respectively; Fig. 3). During the  
103 resting phase, there is a tendency to higher oxygen consumption (F=3.77, p=0.07), confirmed by  
104 significantly higher  $VCO_2$  (+289.3±107.4 ml.kg<sup>-1</sup>.hr<sup>-1</sup>, F=8.83, p=0.009) and Heat (+0.10±0.06 kcal.h<sup>-1</sup>,  
105 F=5.16, p=0.04) in T26 compared to T24 (Fig. 3). Both groups did not exhibit any significantly different  
106 body masses at the end of the treatments (F=0.15, p=0.70).

### 107 4) Oxidative stress

108 Plasma 8OHdG levels were not significantly different between groups (47.71±20.21 vs 51.30±22.75  
109 ng.mL<sup>-1</sup>, F=0.13, p=0.72, Fig. 4).

### 110 5) Learning performances

111 Among the 22 animals, 7 reached the success criterion: 3 in T24 and 4 in T26. The T26 individuals  
112 needed significantly more trials to reach the criterion than the T24 (17.5±1.5 vs 7±3.33, p=0.033; Fig.  
113 5).

### 114 6) Correlations between physiological, metabolic and cognitive parameters

115  
116 In addition to the fact that most of calorimetric parameters are strongly correlated, oxidative stress is  
117 also positively correlated and tends to be correlated with the resting  $VO_2$  and  $VCO_2$  respectively.  
118 Furthermore, the number of trials needed to reach the success criterion in the cognitive task is  
119 positively correlated to resting  $VO_2$  and  $VCO_2$ , *i.e.* the higher resting  $VO_2$  and  $VCO_2$ , the worse the  
120 cognitive capacities are. Finally, body temperature after minimal temperature was reached was  
121 positively correlated with resting  $VCO_2$ , and tends to correlate positively with resting  $VO_2$  and  
122 negatively with cognitive performances (Table S1).

## 123 Discussion

124  
125 In the present study, we aimed at investigating the metabolic costs of the circadian clock daily  
126 synchronization and its cognitive consequences. Our results suggest that a physiological, metabolic  
127 and cognitive cost is daily generated when the free-running period  $\tau$  does not match the  
128 environment periodicity of 24h. Animals submitted to light-dark cycles of 26h, mimicking a great  
129 divergence between  $\tau$  and external cycles, exhibited higher resting body temperature, higher  $VO_2$ ,  
130  $VCO_2$  and Heat levels and lower cognitive performances. To our knowledge, this is the first time that  
131 a study provides some insights on the potential biological costs of clock daily synchronization. The  
132 potential costs of synchronization had been first evoked by Pittendrigh and Minis (1972), then by  
133 Wyse et al. (2010), in order to elucidate the circadian resonance mechanisms, but had never been  
134 assessed so far.

135  
136 Animals in T24 and T26 responded correctly to their light-dark treatments and random feeding times  
137 over the day prevented the animals from being entrained by food distribution. Nevertheless, we  
138 verified that T26 animals were properly entrained to their photoperiodic regimen without masking  
139 effect. Although locomotor activity was restricted to daily dark period, it cannot be ruled out that  
140 other internal body rhythms may be desynchronized with external environment. Tb rhythm of T26

146 individuals displayed a period of 26h, in other words, was entrained to the light-dark cycles and did  
147 not free-run. Despite its non-independent link with locomotor activity, body temperature can inform  
148 on organism entrainment. In most experiments where T is modified and individuals' rhythms  
149 decoupled from external cycles, body temperature and locomotor activity are not synchronized,  
150 locomotor activity being restricted to activity periods and body temperature free-running (Hasan et  
151 al., 2018; Karatsoreos et al., 2011; Legates et al., 2012; Leise et al., 2018; Vivanco et al., 2010), which  
152 was not the case in our data. Moreover, experiments on entrainment limits in mouse lemurs  
153 conducted in our laboratory show that locomotor activity and temperature start decoupling over 27h  
154 (M. Perret, personal communication, dec. 2019), suggesting that 26h T-cycles lie within the mouse  
155 lemur range of entrainment.

156 We observed that T26 animals displayed significantly higher body temperature and higher energy  
157 expenditure ( $VO_2$ ,  $VCO_2$  and Heat) during the resting phase, especially after the daily metabolic fall.  
158 Higher body temperature was neither the consequence of a higher locomotor activity during the  
159 same period. Nor is it due to a potential adaptation time to 26h cycles because the effect was found  
160 regardless of the considered week, even after 3 weeks of photoperiodic treatment (data not shown).  
161 A lot of studies on modified T-cycles were carried out on various species but only a few of them dealt  
162 with daily metabolic and physiological consequences of the organism's entrainment to T-cycles  
163 different from 24h, and none focused on metabolic rate or body temperature. In invertebrates, two  
164 species of *Camponotus* ants exhibited significantly faster pre-adult development under T24  
165 compared to T20 and T28, suggesting a fitness advantage of "resonating" clock (Lone et al., 2010).  
166 Short-period mutant hamsters (whose "natural" endogenous period lies around 24.05h, Davis and  
167 Viswanathan, 1992) displaying a 22h free-running period died younger and exhibited severe cardiac  
168 and renal diseases when raised under cycles of 24h (Martino et al., 2008). Vilaplana et al. (1995)  
169 showed that rats kept under T25 and T26 light-dark cycles during 64 days exhibited lower body  
170 weight, less food intake and less efficiency (*i.e.* relationship between body weight increase and food  
171 intake) than rats kept under T24 cycles. This last experiment could draw an interesting parallel with  
172 our results, since assessed parameters are comparable to those we measured. Nevertheless, the  
173 theory behind these observations is actually totally opposite to our own hypothesis. Indeed,  
174 Vilaplana and colleagues started from the postulate that cycles of 25 or 26h are closer from the rat's  
175 free-running period than 24h and that rats better "resonate" under this cycle length. In this regard,  
176 higher available energy is preferentially allocated to activity and metabolism, rather than to growth  
177 efficiency. On the contrary, we suggest that individuals kept close from resonance frequency would  
178 consume less energy to maintain their clock reset and display a lower metabolism, which contradicts  
179 Vilaplana's hypothesis. Furthermore, the hypothesis of a "better resonating clock under T25 and T26  
180 cycles" can be questioned, since the free-running period of rat is approximately 24.5h (Jan Stenvers  
181 et al., 2016; Strijkstra et al., 1999; van Gool et al., 1987).

182 Among endotherms it has been widely accepted that body temperature is directly influenced by  
183 metabolic rate, as this is the principal origin of endogenous heat (Berger et al., 1988; Clarke et al.,  
184 2010; Gillooly et al., 2001; Lovegrove, 2003; Rey et al., 2015; Rezende and Bacigalupe, 2015; Rising et  
185 al., 1992). In this respect, our calorimetric results are in line with body temperature observations.  
186 Indeed,  $VO_2$ ,  $VCO_2$ , Heat and  $T_b$  were significantly higher in T26 than in T24 animals during the  
187 resting time that closest resembles the basal metabolic state of the animal. Intraspecific negative  
188 relationships between longevity, aging and basal metabolic rate have been found out in numerous  
189 species. They corroborate the rate of living theory (Conti et al., 2006; Redman et al., 2018; Van  
190 Raamsdonk et al., 2010), although comparisons across species sometimes show that metabolism is  
191 not correlated to lifespan (Niitepõld and Hanski, 2013; Promislow and Haselkorn, 2002; Robert et al.,  
192 2007), especially in birds and bats (Munshi-South and Wilkinson, 2010). As for body temperature,  
193 the relationship with aging is well known and fully documented. Several studies confirm that lower  
194 body temperature leads to slower aging and longer lifespan in poikilotherms as well as in  
195 homeotherms (Conti, 2008). Hcrt-UCP2 mutant mice, displaying a reduction of  $T_b$  of 0.5 – 0.6 °C

196 demonstrated up to a 20% increase of median lifespan (Conti et al., 2006). Male C57B1/6 mice  
197 tended to live longer than females and displayed a significantly lower body temperature of 0.2 to 0.5  
198 °C (Sanchez-Alavez et al., 2011). In humans, the Baltimore Longitudinal Study of Aging (BLSA)  
199 reported a lower body temperature related to higher lifespan and other positive physiological effects  
200 (Shock et al., 1984).

201 The rate of living theory has then been further extended into the free-radical theory of aging stating  
202 that aging results from accumulating damages produced by reactive oxygen species, such as 8OHdG  
203 (Harman, 1956). Our results did not exhibit any significant divergent plasma 8OHdG levels between  
204 the different photoperiodic groups. The light-dark treatments provided to the animals may have not  
205 been compelling or long enough to impact significantly the individuals at the DNA level. It highlights  
206 that daily costs imposed by the circadian clock resetting remain marginal at the cellular level. Further  
207 investigations could then consist in extending the duration of the metabolic stress imposed by the  
208 light-dark cycles.

209 Regarding cognitive outcomes, only seven animals reached the success criterion to the learning task,  
210 which is one-third of the total number of individuals. This result may seem low but it lies close to the  
211 success rate observed in other experiments using the same cognitive apparatus (Picq et al., 2015;  
212 Royo et al., 2018). The resulting interpretations must though be viewed cautiously. Among animals  
213 that learned the task, T26 animals needed significantly more trials to reach the success criterion than  
214 the T24. A higher required energy to reset the circadian clock may create a side-effect in cognitive  
215 performances, highlighting a potential trade-off between metabolism and cerebral abilities. It is well  
216 documented that a strong link exists between circadian clock and cerebral performances. Through its  
217 link with the hippocampus (Borgs et al., 2009; Chiang et al., 2017; Schnell et al., 2014, Snider et al.,  
218 2018), the circadian system influences mood, learning, time-place association and memory in  
219 laboratory mice (Albrecht, 2017; Cain et al., 2004; Legates et al., 2012; Ruby et al., 2008), and the  
220 involvement of clock genes is well established (Snider et al., 2016; Van der Zee et al., 2008; Wang et  
221 al., 2009). Furthermore, numerous data indicate that circadian disorganization (jet-lag, phase shifts,  
222 aging alterations, sleep impairments, shift work...) invariably leads to impaired cognitive  
223 performances which suggests that clock resynchronization indirectly impacts cognitive capacities  
224 (Antoniadis et al., 2000; Chellappa et al., 2018; Gibson et al., 2010; Krishnan and Lyons, 2015; Loh et  
225 al., 2010; Rouch et al., 2005). Only a very few studies have tested the effects of a chronic  
226 misalignment between *tau* and T, without sleep-wake cycles decoupled from circadian rhythm. Neto  
227 et al. (2008) reported decreased performances in a passive avoidance memory task in rats kept  
228 under 22h light-dark cycles compared to control group (L:D 24h). The authors of this study raised the  
229 involvement of the circadian clock in an emotional component of the memory task, related to fear or  
230 risk evaluation. The cognitive cost observed in T26 animals could also suggest a lack of sleep, or at  
231 least sleep modification. Locomotor activity profiles are not significantly different between T26 and  
232 T24 groups even though there seems to be a period between 24h and 26h during which T26 animals  
233 activate (Fig. 2A). This non resting period could be associated with a slight sleep debt, which,  
234 cumulated over 20 days, could alter learning performances. A prolonged sleep deprivation affects  
235 cognitive performances, as it has been shown in humans (Reynolds and Banks, 2010; K. J. Wright et  
236 al., 2006), even if the sleep deprivation is moderate (Sadeh et al., 2003; Van Dongen et al., 2003). In  
237 this perspective, a cumulative sleep debt due to sooner activation of T26 animals could explain the  
238 worse results during the discrimination task, without being directly related to a daily synchronization  
239 cost. The altered cognitive performances of T26 animals may also be due to an improper  
240 entrainment to the imposed light-dark cycles. Although locomotor activity and body temperature  
241 were synchronized with each other, other internal rhythms might be desynchronized, suggesting a  
242 masking effect of light on locomotor activity and correlated body temperature, as previously  
243 mentioned. A lot of studies report the negative effect of body rhythms desynchrony on neuro-  
244 behavioral functions, especially during aging, when the biological clock undergoes severe alterations  
245 (Cajochen et al., 2004; Colwell, 2015; Grady et al., 2010; Krishnan and Lyons, 2015; Wright et al.,

246 2006b). In that case, weaker learning performances in T26 animals would rather be due to a potential  
247 internal desynchrony rather than to a cost of synchronization.

248 Although the inter-correlations between cognitive, cellular and metabolic parameters suggest a  
249 multi-scale effect of photoperiodic treatments on tested individuals, the precise mechanisms  
250 underlying the relationship between clock daily synchronization and metabolic costs remain so far  
251 unknown and can only be hypothesized. They besides require the cellular mechanisms of light  
252 entrainment, that remain barely investigated (Johnson, Elliot & Foster, 2003). In laboratory  
253 conditions, *i.e.* under constant intensity of light, clock entrainment is supposed to follow a discrete  
254 model, where light activation and extinction are supposed to mimic dawn and dusk transitions. The  
255 light is indeed assumed to act effectively at phases transition, e.g. at dawn or dusk. In the case of the  
256 T26 animals, synchronization of clock should occur at the beginning of the light phase (*i.e.* after 11h  
257 of darkness) and at its end (*i.e.* after 15h of light). As described by Johnson, Elliot & Foster (2003), the  
258 entrainment of the clock should induce a great phase delay at dusk (*i.e.* light extinction) and a smaller  
259 phase advance at dawn (*i.e.* light activation), in such a way that the net phase shift is ( $26h - \tau$ ), that  
260 is around 2h. In that configuration, the light input is postulated to activate the expression of Fos  
261 genes, followed by the activation of Per1 and Per2, dependently on the moment of the circadian  
262 time (Cao et al., 2015; Challet, 2007). It has also been suggested that epigenetic processes were  
263 involved in clock synchronization and plasticity (Azzi et al., 2017). These reactions are energy-  
264 consuming (Bass and Takahashi, 2010; Golombek and Rosenstein, 2010), and one may suppose that  
265 the energy required to elicit an important phase delay in the T26 animals is greater than the energy  
266 required for the resynchronization of the T24 ones. High energetic gene activations may lead to  
267 higher metabolism and as a consequence, higher body temperature. A further interesting question is  
268 to know whether a continuous model of entrainment (*i.e.* with transitions between light and dark  
269 phases and daily varying illumination levels) would affect metabolic features differently.

270 To conclude, our results seem to highlight that external photoperiod lengths deviating from the free-  
271 running period increase metabolic daily requirements to keep the circadian clock reset and might  
272 result in a cognitive cost. The accumulation of repetitive marginal costs would accelerate aging  
273 process and lead to lower survival. These investigations could then provide an initial insight of the  
274 mechanisms underlying the circadian resonance theory and opens the way to further investigations:  
275 immune, cardiovascular or other markers of fitness, such as reproduction performances could  
276 constitute complementary significant costs of circadian clock daily synchronization.

## 277 Materials & Methods

### 278 1) Animals and ethical statement

279 All mouse lemurs studied were males born in the laboratory breeding colony of the CNRS/MNHN in  
280 Brunoy, France (UMR 7179 CNRS/MNHN; European Institutions Agreement # E91-114.1). All  
281 experiments were performed in accordance with the Principles of Laboratory Animal Care (National  
282 Institutes of Health publication 86-23, revised 1985) and the European Communities Council  
283 Directive (86/609/EEC). The research was conducted under the approval of the Cuvier Ethical  
284 Committee (Committee number 68 of the "Comité National de Réflexion Ethique sur  
285 l'Expérimentation Animale") under authorization number 12992-2018011613568518 v4.

286 All cages were equipped with wood branches for climbing activities as well as wooden sleeping  
287 boxes. The ambient temperature and the humidity of the rooms were maintained at 25 to 27°C and  
288 at 55% to 65%, respectively. When they are not involved in experimental protocols, animals in  
289 facilities are exposed to an artificial photoperiodic regimen consisting of alternating periods of 6  
290 months of summer-like long day (Light-Dark (L:D) 14:10) and 6 months of winter-like short days (L:D  
291 10:14), in order to ensure seasonal biological rhythms (Perret and Aujard, 2001). The following  
292 described experiment focused on animals during the long-day season.

## 293 2) Experimental procedure

294 Twenty-two male gray mouse lemurs between 2 and 4 years-old were chosen randomly in the  
295 colony. Before the start of the experiment (see Fig. 6), the animals were isolated under light-dark  
296 cycles of 24h (L:D 14:10); the metabolic activity was measured using a calorimetry system during 5  
297 days, followed by blood sampling to assess individual oxidative stress. We then submitted the  
298 animals to two different photoperiodic treatments during 22 days. Individuals of the first group (T24,  
299 n=11) were kept under light-dark cycles T of 24h with 14 hours of light (resting phase) and 10 hours  
300 of darkness (active phase) per day (L:D 14:10). Mouse lemurs of the second group (T26, n=11) were  
301 submitted to light-dark cycles T of 26h (L:D 15:11), mimicking a great divergence between their free-  
302 running period and the environmental periodicity. After 15 days, metabolic activity was measured  
303 again during 5 days in the indirect calorimetry set-up, followed by blood sampling. Afterwards, the  
304 animals performed a cognitive task during the last 2 days of experiment. Animals were fed at random  
305 times of the day with fresh fruits and a homemade mixture, corresponding to an energy intake of  
306 25.32 kcal.day<sup>-1</sup> (see Dal-pan et al., 2011 for details). Food intake and body mass were daily  
307 monitored, and body temperature (Tb) and locomotor activity (LA) were recorded continuously using  
308 telemetry implants during the whole experiment.

## 309 3) Indirect calorimetry system

310 Metabolic activity was recorded using an indirect calorimetry system (Oxymax, Columbus  
311 Instruments Inc, Columbus, Ohio, USA). Animals were housed in individual metabolic cages during 5  
312 days (with one day for acclimation before measurements). Oxygen consumption (VO<sub>2</sub>), carbon  
313 dioxide production (VCO<sub>2</sub>) and energy expenditure ( $Heat = 3.815 \times VO_2 + 1.232 \times VCO_2$ , see Lusk,  
314 1924) were recorded continuously. VO<sub>2</sub> and VCO<sub>2</sub> were expressed as a function of the whole body  
315 mass (mL.hr<sup>-1</sup>.kg<sup>-1</sup>) and Heat in kcal.hr<sup>-1</sup>.

## 316 4) Body temperature and locomotor activity telemetric monitoring

317 Recording of locomotor activity and body temperature was obtained by telemetry. A small telemetric  
318 transmitter weighing 2.5 g (model TA10TA-F10, DataScience Co. Ltd, Minnesota, USA) was implanted  
319 into the visceral cavity under isoflurane anesthesia (4% for induction and 1-1.5% for maintenance).  
320 After surgery, animals returned to their home cage and were allowed to recover for 15 days before  
321 the start of experiment and continuous recordings of LA and Tb. Total recovery was checked by visual  
322 inspection of the complete healing of the surgical incision and by verification of a stable daily pattern  
323 of Tb variations. Temperature was punctually monitored every 5 minutes and locomotor activity was  
324 continuously recorded by a receiver placed into the cage, which detected vertical and horizontal  
325 movements and transmitted data to the computer (coordinate system, DataquestLab Prov.3.0,  
326 DataScience Co.Ltd, Minnesota, USA). LA data were summed in 5 minutes intervals and expressed in  
327 arbitrary unit (a.u.). Periods of activity rhythms were calculated using the Lomb–Scargle periodogram  
328 (LSP) procedure (Ruf, 1999), with Clocklab software (Actimetrics, Evanston, IL, USA). AL and Tb values  
329 were averaged over the 20 days of photoperiodic treatment (the last two days were excluded to  
330 avoid the influence of the cognitive task on AL and Tb data). Two implants in the T24 group and one  
331 implant in the T26 group were found partially or totally defective; Tb and AL could not thus be  
332 recorded.

## 333 5) Oxidative stress measurements

334 Mouse lemurs' blood was collected 3h before the onset of the individuals. Two hundred µL of blood  
335 were taken via the saphenous vein, and collected in tubes containing EDTA. Blood samples were then  
336 centrifuged at 2000g at 4°C for 30 minutes and plasma was collected in order to measure plasma 8-  
337 hydroxy-2'-deoxyguanosine (8-OHdG) levels in ng.mL<sup>-1</sup> (OxiSelect™ Oxidative DNA Damage Elisa kit,  
338 Cell Biolabs Inc.).

## 339 6) Cognitive apparatus

340 The cognitive task was first described by Picq et al. (2015), inspired from apparatus designed by  
341 Lashley (1930) for rodents and based on visual discrimination. In the present study, it was conducted  
342 over a two-day period, 3h hours before the light extinction. The first day is dedicated to animals'  
343 habituation to the set-up. The discrimination test takes place on the second day. The animal is  
344 introduced in a big squared vertical cage through an opening in the wall, to an elevated starting  
345 platform. It has to jump onto one of two landing platforms, fixed below on the opposite wall. A hole  
346 centered behind the two landing platforms leads to a nesting box behind the cage. On each landing  
347 platform, a visual *stimulus* helps discriminating the left and right platforms. One of these visual clues  
348 is the positive *stimulus*, the other is the negative one. At each trial, the landing platform with the  
349 positive clue is kept fixed and leads to the nesting box, whereas the platform with the negative clue  
350 is mobile and toggles when the animal jumps on it, such a way that it falls on a cushion pillow, to  
351 prevent any injury. At each trial, the location of the positive and negative stimuli on the right or left  
352 landing platform is randomized. The animal was given 30 trials to reach the success criterion  
353 consisting in 8 jumps on the positive platform within 10 consecutive trials. For each animal, we  
354 measured the number of trials needed to reach the success criterion (for more details, see Picq et al.,  
355 2015).

## 356 7) Statistical analysis

357  
358 Normality was verified using Shapiro-wilk tests. Non-normally distributed data were log-transformed  
359 (*i.e.* Heat of the active phase and locomotor activity). Outliers were detected and removed using  
360 Dixon tests (one T26 individual for oxidative stress). T-tests were used to verify the proper  
361 entrainment of T24 and T26 animals. ANOVAs between different treatments were performed for the  
362 mean VO<sub>2</sub>, VCO<sub>2</sub>, Heat, Tb and LA during active phase and resting phase, body mass and oxidative  
363 stress before and after treatments. A non-parametric Kruskal-Wallis test was applied to compare  
364 cognitive performances between the two treatments. Data were analyzed using R Studio software  
365 with p<0.05 taken as statistical significance. Data are presented as mean ± SEM.

## 366 Acknowledgments

367 We warmly thank Jérémy Terrien for his assistance in the statistical analysis and his thorough re-  
368 reading of this article and Martine Perret and Fabienne Aujard for their help in elaborating the  
369 experimental design.

## 370 Competing interests

371 No competing interests declared.

## 372 References

- 373 Albrecht U. 2017. Molecular mechanisms in mood regulation involving the circadian clock. *Front Neurol* **8**:1–6.  
374 doi:10.3389/fneur.2017.00030
- 375 Antoniadis EA, Ko CH, Ralph MR, McDonald RJ. 2000. Circadian rhythms, aging and memory. *Behav Brain Res*  
376 **111**:25–37. doi:10.1016/S0166-4328(00)00145-5
- 377 Azzi A, Evans JA, Leise T, Myung J, Takumi T, Davidson AJ, Brown SA. 2017. Network Dynamics Mediate  
378 Circadian Clock Plasticity. *Neuron* **93**:441–450. doi:10.1016/j.neuron.2016.12.022
- 379 Bass J, Takahashi J. 2010. Circadian Integration of Metabolism and Energetics. *Science (80- )* **330**:1349–1354.  
380 doi:10.1126/science.1195027
- 381 Berger RJ, Palca JW, Walker JM, Phillips NH. 1988. Correlations between body temperatures, metabolic rate



- 382 and slow wave sleep in humans. *Neurosci Lett* **86**:230–234. doi:10.1016/0304-3940(88)90576-9
- 383 Bons N, Rieger F, Prudhomme D, Fisher A, Krause KH. 2006. *Microcebus murinus*: A useful primate model for  
384 human cerebral aging and Alzheimer's disease? *Genes, Brain Behav* **5**:120–130. doi:10.1111/j.1601-  
385 183X.2005.00149.x
- 386 Borgs L, Beukelaers P, Vandenbosch R, Nguyen L, Moonen G, Maquet P, Albrecht U, Belachew S, Malgrange B.  
387 2009. Period 2 regulates neural stem/progenitor cell proliferation in the adult hippocampus. *BMC*  
388 *Neurosci* **10**. doi:10.1186/1471-2202-10-30
- 389 Buijs R, Salgado R, Sabath E, Escobar C. 2013. *Peripheral circadian oscillators: Time and food*, 1st ed, Progress in  
390 Molecular Biology and Translational Science. Elsevier Inc. doi:10.1016/B978-0-12-396971-2.00004-X
- 391 Cain SW, Chou T, Ralph MR. 2004. Circadian modulation of performance on an aversion-based place learning  
392 task in hamsters. *Behav Brain Res* **150**:201–205. doi:10.1016/j.bbr.2003.07.001
- 393 Cajochen C, Blatter K, Wallach D. 2004. Circadian and sleep-wake dependent impact on neurobehavioral  
394 function. *Psychol Belg* **44**:59–80.
- 395 Cao R, Gkogkas CG, De Zavalía N, Blum ID, Yanagiya A, Tsukumo Y, Xu H, Lee C, Storch KF, Liu AC, Amir S,  
396 Sonenberg N. 2015. Light-regulated translational control of circadian behavior by eIF4E phosphorylation.  
397 *Nat Neurosci* **18**:855–862. doi:10.1038/nn.4010
- 398 Cayetanot F, Van Someren E, Perret M, Aujard F. 2005. Shortened seasonal photoperiodic cycles accelerate  
399 aging of the diurnal and circadian locomotor activity rhythms in a primate. *J Biol Rhythms* **20**:461–469.  
400 doi:10.1177/0748730405279174
- 401 Challet E. 2007. Minireview: Entrainment of the suprachiasmatic clockwork in diurnal and nocturnal mammals.  
402 *Endocrinology* **148**:5648–5655. doi:10.1210/en.2007-0804
- 403 Chellappa SL, Morris CJ, Scheer FAJL. 2018. Daily circadian misalignment impairs human cognitive performance  
404 task-dependently. *Sci Rep* **8**:1–11. doi:10.1038/s41598-018-20707-4
- 405 Chiang CK, Xu B, Mehta N, Mayne J, Sun WYL, Cheng K, Ning Z, Dong J, Zou H, Cheng HYM, Figeys D. 2017.  
406 Phosphoproteome profiling reveals circadian clock regulation of posttranslational modifications in the  
407 murine hippocampus. *Front Neurol* **8**:1–12. doi:10.3389/fneur.2017.00110
- 408 Clarke A, Rothery P, Isaac NJB. 2010. Scaling of basal metabolic rate with body mass and temperature in  
409 mammals. *J Anim Ecol* **79**:610–619. doi:10.1111/j.1365-2656.2010.01672.x
- 410 Colwell CS. 2015. How a Disrupted Clock may Cause a Decline in Learning and Memory. *Circadian Med* **1**–353.  
411 doi:10.1002/9781118467831
- 412 Conti B. 2008. Considerations on temperature, longevity and aging. *Cell Mol Life Sci* **65**:1626–1630.  
413 doi:10.1007/s00018-008-7536-1
- 414 Conti B, Sanchez-Alavez M, Winsky-Sommerer R, Morale MC, Lucero J, Brownell S, Fabre V, Huitron-Resendiz S,  
415 Henriksen S, Zorrilla EP, Lecea L de, Bartfai T. 2006. Transgenic Mice with a Reduced Core Body  
416 Temperature Have an Increased Life Span. *Science (80- )* **314**:825–828. doi:10.1126/science.1132191
- 417 Dal-pan A, Terrien J, Pifferi F, Botalla R, Hardy I, Marchal J, Zahariev A, Chery I, Zizzari P, Perret M, Picq J,  
418 Epelbaum J. 2011. Caloric restriction or resveratrol supplementation and ageing in a non-human  
419 primate: first-year outcome of the RESTRIKAL study in *Microcebus murinus*. *Age (Omaha)* **33**:15–31.  
420 doi:10.1007/s11357-010-9156-6
- 421 Davis FC, Viswanathan N. 1992. Stability of circadian timing with age in Syrian hamsters. *Am J Physiol Regul*  
422 *Integr Comp Physiol* **275**:6–10.
- 423 Duong HA, Robles MS, Knutti D, Weitz C. 2011. A Molecular Mechanism for Circadian. *Science (80- )* **332**:1436–  
424 1439. doi:10.1126/science.1196766

- 425 Dvornyk V, Vinogradova O, Nevo E. 2003. Origin and evolution of circadian clock genes in prokaryotes. *Proc*  
426 *Natl Acad Sci U S A* **100**:2495–2500. doi:10.1073/pnas.0130099100
- 427 Génin F, Perret M. 2000. Photoperiod-induced changes in energy balance in gray mouse lemurs. *Physiol Behav*  
428 **71**:315–321. doi:10.1016/S0031-9384(00)00335-8
- 429 Gibson EM, Wang C, Tjho S, Khattar N, Kriegsfeld LJ. 2010. Experimental “jet lag” inhibits adult neurogenesis  
430 and produces long-term cognitive deficits in female hamsters. *PLoS One* **5**.  
431 doi:10.1371/journal.pone.0015267
- 432 Gillooly JF, Brown J, West G, Savage V, Charnov E. 2001. Effects of Size and Temperature on Metabolic Rate.  
433 *Science (80- )* **293**:2249–2251. doi:10.1126/science.1061967
- 434 Golombek DA, Rosenstein RE. 2010. Physiology of circadian entrainment. *Physiol Rev* **90**:1063–1102.  
435 doi:10.1152/physrev.00009.2009
- 436 Grady S, Aeschbach D, Wright KP, Czeisler CA. 2010. Effect of modafinil on impairments in neurobehavioral  
437 performance and learning associated with extended wakefulness and circadian misalignment.  
438 *Neuropsychopharmacology* **35**:1910–1920. doi:10.1038/npp.2010.63
- 439 Halberg F. 1962. Circadian (about twenty-four-hour) Rhythms in Experimental Medicine [ Abridged ]. *Proc of the*  
440 *R Soc Med* **56**:253–257.
- 441 Harman D. 1956. Aging: a Theory Based on Free Radical and Radiation Chemistry. *J Gerontol* **11**:298–300.
- 442 Hasan S, Foster RG, Vyazovskiy V V., Peirson SN. 2018. Effects of circadian misalignment on sleep in mice. *Sci*  
443 *Rep* **8**:1–13. doi:10.1038/s41598-018-33480-1
- 444 Hozer C, Pifferi F, Aujard F, Perret M. 2019. The Biological Clock in Gray Mouse Lemur: Adaptive, Evolutionary  
445 and Aging Considerations in an Emerging Non-human Primate Model. *Front Physiol* **10**:1–23.  
446 doi:10.3389/fphys.2019.01033
- 447 Jan Stenvers D, Van Dorp R, Foppen E, Mendoza J, Opperhuizen AL, Fliers E, Bisschop PH, Meijer JH, Kalsbeek A,  
448 Deboer T. 2016. Dim light at night disturbs the daily sleep-wake cycle in the rat. *Sci Rep* **6**:4–15.  
449 doi:10.1038/srep35662
- 450 Joly M, Ammersdörfer S, Schmidtke D, Zimmermann E. 2014. Touchscreen-based cognitive tasks reveal age-  
451 related impairment in a primate aging model, the grey mouse lemur (*Microcebus murinus*). *PLoS One* **9**.  
452 doi:10.1371/journal.pone.0109393
- 453 Karatsoreos IN, Bhagat S, Bloss EB, Morrison JH, McEwen BS. 2011. Disruption of circadian clocks has  
454 ramifications for metabolism, brain, and behavior. *Proc Natl Acad Sci U S A* **108**:1657–1662.  
455 doi:10.1073/pnas.1018375108
- 456 Krishnan HC, Lyons LC. 2015. Synchrony and desynchrony in circadian clocks: Impacts on learning and memory.  
457 *Learn Mem* **22**:426–437. doi:10.1101/lm.038877.115
- 458 Kyriacou CP, Hastings MH. 2010. Circadian clocks: genes, sleep, and cognition. *Trends Cogn Sci* **14**:259–267.  
459 doi:10.1016/j.tics.2010.03.007
- 460 Lande-Diner L, Boyault C, Kim JY, Weitz CJ. 2013. A positive feedback loop links circadian clock factor CLOCK-  
461 BMAL1 to the basic transcriptional machinery. *Proc Natl Acad Sci* **110**:16021–16026.  
462 doi:10.1073/pnas.1305980110
- 463 Languille S, Blanc S, Blin O, Canale CI, Dal-Pan A, Devau G, Dhenain M, Dorieux O, Epelbaum J, Gomez D, Hardy  
464 I, Henry PY, Irving EA, Marchal J, Mestre-Francés N, Perret M, Picq J, Pifferi F, Rahman A, Schenker E,  
465 Terrien J, Théry M, Verdier JM, Aujard F. 2012. The grey mouse lemur: A non-human primate model for  
466 ageing studies. *Ageing Res Rev* **11**:150–162. doi:10.1016/j.arr.2011.07.001
- 467 Lashley KS. 1930. The Mechanism of Vision: I. A Method for Rapid Analysis of Pattern-Vision in the Rat.

- 468 *Pedagog Semin J Genet Psychol* **37**:453–460. doi:10.1080/08856559.1930.9944155
- 469 Legates TA, Altimus CM, Wang H, Lee HK, Yang S, Zhao H, Kirkwood A, Weber ET, Hattar S. 2012. Aberrant light  
470 directly impairs mood and learning through melanopsin-expressing neurons. *Nature* **491**:594–598.  
471 doi:10.1038/nature11673
- 472 Leise TL, Goldberg A, Michael J, Montoya G, Solow S, Molyneux P, Vetrivelan R, Harrington ME. 2018. Recurring  
473 circadian disruption alters circadian clock sensitivity to resetting. *Eur J Neurosci* 0–3.  
474 doi:10.1111/ejn.14179
- 475 Libert S, Bonkowski MS, Pointer K, Pletcher SD, Guarente L. 2012. Deviation of innate circadian period from 24h  
476 reduces longevity in mice. *Aging Cell* **11**:794–800. doi:10.1111/j.1474-9726.2012.00846.x
- 477 Loh DH, Navarro J, Hagopian A, Wang LM, Deboer T, Colwell CS. 2010. Rapid changes in the light/dark cycle  
478 disrupt memory of conditioned fear in mice. *PLoS One* **5**:1–12. doi:10.1371/journal.pone.0012546
- 479 Lone SR, Ilangovan V, Murugan M, Sharma VK. 2010. Circadian resonance in the development of two sympatric  
480 species of *Camponotus* ants. *J Insect Physiol* **56**:1611–1616. doi:10.1016/j.jinsphys.2010.05.023
- 481 Lovegrove BG. 2003. The influence of climate on the basal metabolic rate of small mammals: A slow-fast  
482 metabolic continuum. *J Comp Physiol B Biochem Syst Environ Physiol* **173**:87–112. doi:10.1007/s00360-  
483 002-0309-5
- 484 Lusk G. 1924. Animal Calorimetry. Analysis of the oxidation of mixtures of carbohydrate and fat. *J Biol Chem*  
485 **59**:41–43.
- 486 Martino TA, Oudit GY, Herzenberg AM, Tata N, Koletar MM, Kabir GM, Belsham DD, Backx PH, Ralph M, Sole  
487 MJ. 2008. Circadian rhythm disorganization produces profound cardiovascular and renal disease in  
488 hamsters. *Am J Physiol - Regul Integr Comp Physiol* **294**:R1675-83. doi:10.1152/ajpregu.00829.2007.
- 489 Moore RY. 2013. The suprachiasmatic nucleus and the circadian timing system, 1st ed, Progress in Molecular  
490 Biology and Translational Science. Elsevier Inc. doi:10.1016/B978-0-12-396971-2.00001-4
- 491 Munshi-South J, Wilkinson GS. 2010. Bats and birds: Exceptional longevity despite high metabolic rates. *Ageing*  
492 *Res Rev* **9**:12–19. doi:10.1016/j.arr.2009.07.006
- 493 Neto SPD, Carneiro BTS, Valentinuzzi VS, Araújo JF. 2008. Dissociation of the circadian rhythm of locomotor  
494 activity in a 22 h light-dark cycle impairs passive avoidance but not object recognition memory in rats.  
495 *Physiol Behav* **94**:523–527. doi:10.1016/j.physbeh.2008.03.013
- 496 Niitepõld K, Hanski I. 2013. A long life in the fast lane: Positive association between peak metabolic rate and  
497 lifespan in a butterfly. *J Exp Biol* **216**:1388–1397. doi:10.1242/jeb.080739
- 498 Paranjpe DA, Anitha D, Kumar S, Kumar D, Verkhedkar K, Chandrashekar MK, Joshi A, Sharma VK. 2003.  
499 Entrainment of Eclosion Rhythm in *Drosophila melanogaster* Populations Reared for More than 700  
500 Generations in Constant Light Environment. *Chronobiol Int* **20**:977–987. doi:10.1081/CBI-120025247
- 501 Pearl R. 1928. The Rate of Living, Being an Account of Some Experimental Studies on the Biology of Life  
502 Duration Alfred A. Knopf, New York. pp. 1–185.
- 503 Perret M, Aujard F. 2001. Regulation by photoperiod of seasonal changes in body mass and reproductive  
504 function in gray mouse lemurs *M murinus* Perret 2001 - Copy.pdf. *Int J Primatol* **22**:5–24.
- 505 Picq J, Villain N, Gary C, Pifferi F, Dhenain M. 2015. Jumping stand apparatus reveals rapidly specific age-related  
506 cognitive impairments in mouse lemur primates. *PLoS One* **10**:1–11. doi:10.1371/journal.pone.0146238
- 507 Pittendrigh C. 1993. Temporal Organization: Reflections of a Darwinian Clock-Watcher. *Annu Rev Physiol* **55**:17–  
508 54. doi:10.1146/annurev.ph.55.030193.000313
- 509 Pittendrigh C. 1960. Circadian rhythms and the circadian organization of living systems. *Cold Spring Harb Symp*

- 510 *Quant Biol* **25**:159–184. doi:10.1101/SQB.1960.025.01.015
- 511 Pittendrigh C, Daan S. 1976. A functional analysis of circadian pacemakers in nocturnal rodents. I. The Stability  
512 and Lability of Spontaneous Frequency. *J Comp Physiol* **106**:291–331. doi:10.1007/BF01417859
- 513 Pittendrigh C, Minis DH. 1972. Circadian systems: longevity as a function of circadian resonance in *Drosophila*  
514 *melanogaster*. *Proc Natl Acad Sci U S A* **69**:1537–1539. doi:10.1073/pnas.69.6.1537
- 515 Promislow DEL, Haselkorn TS. 2002. Age-specific metabolic rates and mortality rates in the genus *Drosophila*.  
516 *Aging Cell* **1**:66–74. doi:10.1046/j.1474-9728.2002.00009.x
- 517 Redman LM, Smith SR, Burton JH, Martin CK, Il'yasova D, Ravussin E. 2018. Metabolic Slowing and Reduced  
518 Oxidative Damage with Sustained Caloric Restriction Support the Rate of Living and Oxidative Damage  
519 Theories of Aging. *Cell Metab* **27**:805-815.e4. doi:10.1016/j.cmet.2018.02.019
- 520 Rey B, Halsey LG, Hetem RS, Fuller A, Mitchell D, Rouanet JL. 2015. Estimating resting metabolic rate by  
521 biologging core and subcutaneous temperature in a mammal. *Comp Biochem Physiol -Part A Mol Integr*  
522 *Physiol* **183**:72–77. doi:10.1016/j.cbpa.2015.01.012
- 523 Reynolds AC, Banks S. 2010. Total sleep deprivation, chronic sleep restriction and sleep disruption, Progress in  
524 Brain Research. Elsevier B.V. doi:10.1016/B978-0-444-53702-7.00006-3
- 525 Rezende EL, Bacigalupe LD. 2015. Thermoregulation in endotherms: physiological principles and ecological  
526 consequences. *J Comp Physiol B Biochem Syst Environ Physiol* **185**:709–727. doi:10.1007/s00360-015-  
527 0909-5
- 528 Rising R, Keys A, Ravussin E, Bogardus C. 1992. Concomitant interindividual variation in body temperature and  
529 metabolic rate. *Am J Physiol - Endocrinol Metab* **263**. doi:10.1152/ajpendo.1992.263.4.e730
- 530 Robert KA, Brunet-Rossinni A, Bronikowski AM. 2007. Testing the “free radical theory of aging” hypothesis:  
531 Physiological differences in long-lived and short-lived colubrid snakes. *Aging Cell* **6**:395–404.  
532 doi:10.1111/j.1474-9726.2007.00287.x
- 533 Rouch I, Wild P, Ansiau D, Marquie JC. 2005. Shiftwork experience, age and cognitive performance. *Ergonomics*  
534 **48**:1282–1293. doi:10.1080/00140130500241670
- 535 Royo J, Villain N, Champeval D, Del Gallo F, Bertini G, Aujard F, Pifferi F. 2018. Effects of n-3 polyunsaturated  
536 fatty acid supplementation on cognitive functions, electrocortical activity and neurogenesis in a non-  
537 human primate, the grey mouse lemur (*Microcebus murinus*). *Behav Brain Res* **347**:394–407.  
538 doi:10.1016/j.bbr.2018.02.029
- 539 Ruby NF, Hwang CE, Wessells C, Fernandez F, Zhang P, Sapolsky R, Heller HC. 2008. Hippocampal-dependent  
540 learning requires a functional circadian system. *Proc Natl Acad Sci U S A* **105**:15593–15598.  
541 doi:10.1073/pnas.0808259105
- 542 Ruf T. 1999. The Lomb-Scargle periodogram in biological rhythm research: Analysis of incomplete and  
543 unequally spaced time-series. *Biol Rhythm Res* **30**:178–201. doi:10.1076/brhm.30.2.178.1422
- 544 Sadeh A, Gruber R, Raviv A. 2003. The Effects of Sleep Restriction and Extension on School-Age Children: What  
545 a Difference an Hour Makes. *Child Dev* **74**:444–455. doi:10.1111/1467-8624.7402008
- 546 Sanchez-Alavez M, Alboni S, Conti B. 2011. Sex- and age-specific differences in core body temperature of  
547 C57Bl/6 mice. *Age (Omaha)* **33**:89–99. doi:10.1007/s11357-010-9164-6
- 548 Schnell A, Chappuis S, Schmutz I, Brai E, Ripperger JA, Schaad O, Welzl H, Descombes P, Alberi L, Albrecht U.  
549 2014. The nuclear receptor REV-ERB $\alpha$  regulates *Fabp7* and modulates adult hippocampal neurogenesis.  
550 *PLoS One* **9**:1–14. doi:10.1371/journal.pone.0099883
- 551 Sharma VK. 2003. Adaptive Significance of Circadian Clocks. *Chronobiol Int J Biol Med Rhythm Res* **20**:901–919.  
552 doi:Article

- 553 Shock NW, Greulich RC, Andres R, Arenberg D, Costa Jr. PT, Lakatta EG, Tobin J. 1984. Normal Human Aging:  
554 The Baltimore Longitudinal Study of Aging. (*US Gov Print Off Washington, DC*).
- 555 Snider KH, Dziema H, Aten S, Loeser J, Norona FE, Hoyt K, Obrietan K. 2016. Modulation of learning and  
556 memory by the targeted deletion of the circadian clock gene *Bmal1* in forebrain circuits. *Behav Brain Res*  
557 **308**:222–235. doi:10.1016/j.bbr.2016.04.027
- 558 Snider KH, Sullivan KA, Obrietan K. 2018. Circadian Regulation of Hippocampal-Dependent Memory: Circuits,  
559 Synapses, and Molecular Mechanisms. *Neural Plast* **2018**. doi:10.1155/2018/7292540
- 560 Strijkstra AM, Meerlo P, Beersma DGM. 1999. Forced desynchrony of circadian rhythms of body temperature  
561 and activity in rats. *Chronobiol Int* **16**:431–440. doi:10.3109/07420529908998718
- 562 Van der Zee EA, Havekes R, Barf RP, Hut RA, Nijholt IM, Jacobs EH, Gerkema MP. 2008. Circadian Time-Place  
563 Learning in Mice Depends on Cry Genes. *Curr Biol* **18**:844–848. doi:10.1016/j.cub.2008.04.077
- 564 Van Dongen HPA, Maislin G, Mullington JM, Dinges DF. 2003. The cumulative cost of additional wakefulness:  
565 Dose-response effects on neurobehavioral functions and sleep physiology from chronic sleep restriction  
566 and total sleep deprivation. *Sleep* **26**:117–126. doi:10.1093/sleep/26.2.117
- 567 van Gool WA, Witting W, Mirmiran M. 1987. Age-related changes in circadian sleep-wakefulness rhythms in  
568 male rats isolated from time cues. *Brain Res* **413**:384–387. doi:10.1016/0006-8993(87)91034-1
- 569 Van Raamsdonk JM, Meng Y, Camp D, Yang W, Jia X, Bénard C, Hekimi S. 2010. Decreased energy metabolism  
570 extends life span in *Caenorhabditis elegans* without reducing oxidative damage. *Genetics* **185**:559–571.  
571 doi:10.1534/genetics.110.115378
- 572 Vaze KM, Sharma VK. 2013. On the adaptive significance of circadian clocks for their owners. *Chronobiol Int*  
573 **30**:413–433. doi:10.3109/07420528.2012.754457
- 574 Vilaplana J, Madrid JA, Sánchez-Vázquez J, Campuzano A, Cambras T, Díez-Noguera A. 1995. Influence of period  
575 length of light/dark cycles on the body weight and food intake of young rats. *Physiol Behav* **58**:9–13.  
576 doi:10.1016/0031-9384(95)00021-A
- 577 Vivanco P, Ojalora BB, Rol MÁ, Madrid JA. 2010. Dissociation of the circadian system of octodon degus by T28  
578 and T21 light-dark cycles. *Chronobiol Int* **27**:1580–1595. doi:10.3109/07420528.2010.510228
- 579 von Saint Paul U, Aschoff J. 1978. Longevity among blowflies *Phormia terraenovae* R.D. kept in non-24-hour  
580 light-dark cycles. *J Comp Physiol [A]* **127**:191–195. doi:10.1007/BF01350109
- 581 Wang LMC, Dragich JM, Kudo T, Odom IH, Welsh DK, O'Dell TJ, Colwell CS. 2009. Expression of the circadian  
582 clock gene *Period2* in the hippocampus: Possible implications for synaptic plasticity and learned  
583 behaviour. *ASN Neuro* **1**:139–152. doi:10.1042/AN20090020
- 584 Wright KJ, Hull J, Hughes R, Ronda J, Czeisler C. 2006. Sleep and Wakefulness Out of Phase with Internal  
585 Biological Time Impairs Learning in Humans. *J Cogn Neurosci* **18**:508–521.
- 586 Wright KP, Hull JT, Hughes RJ, Ronda JM, Czeisler CA. 2006. Sleep and wakefulness out of phase with internal  
587 biological time impairs learning in humans. *J Cogn Neurosci* **18**:508–521. doi:10.1162/jocn.2006.18.4.508
- 588 Wyse CA, Coogan AN, Selman C, Hazlerigg DG, Speakman JR. 2010. Association between mammalian lifespan  
589 and circadian free-running period: the circadian resonance hypothesis revisited. *Biol Lett* **6**:696–698.  
590 doi:10.1098/rsbl.2010.0152
- 591 Yamaguchi S, Isejima H, Matsuo T, Okura R, Kobayashi M, Okamura H, Yamaguchi S, Isejima H, Matsuo T. 2003.  
592 Synchronization of Cellular Clocks in the Suprachiasmatic Nucleus. *Science (80- )* **302**:1408–1412.
- 593

## Figures and Tables

| Parameters                                               | T24 (n=11)   | T26 (n=11)   | F    | P    |
|----------------------------------------------------------|--------------|--------------|------|------|
| Body mass (g)                                            | 85.1±1.7     | 84.0±2.3     | 0.02 | 0.88 |
| Oxidative stress (ng.mL <sup>-1</sup> )                  | 49.34±9.67   | 57.33±9.72   | 0.54 | 0.47 |
| <b>Resting phase</b>                                     |              |              |      |      |
| VO <sub>2</sub> (mL.kg <sup>-1</sup> .h <sup>-1</sup> )  | 1599.9±63.5  | 1636.0±67.0  | 0.24 | 0.63 |
| VCO <sub>2</sub> (mL.kg <sup>-1</sup> .h <sup>-1</sup> ) | 1328.9±49.6  | 1304.3±51.2  | 0.24 | 0.63 |
| Heat (kcal.h <sup>-1</sup> )                             | 0.66±0.03    | 0.69±0.03    | 0.91 | 0.35 |
| Body temperature (°C)                                    | 36.40±0.24   | 36.38±0.27   | 0.01 | 0.93 |
| Locomotor activity (a.u.)                                | 1.66±0.17    | 2.64±0.42    | 1.39 | 0.26 |
| <b>Active phase</b>                                      |              |              |      |      |
| VO <sub>2</sub> (mL.kg <sup>-1</sup> .h <sup>-1</sup> )  | 2627.2±214.6 | 2737.2±164.4 | 0.01 | 0.95 |
| VCO <sub>2</sub> (mL.kg <sup>-1</sup> .h <sup>-1</sup> ) | 2576.1±200.4 | 2611.2±151.1 | 0.18 | 0.68 |
| Heat (kcal.h <sup>-1</sup> )                             | 1.13±0.07    | 1.17±0.08    | 0.01 | 0.94 |
| Body temperature (°C)                                    | 38.05±0.14   | 37.86±0.16   | 0.67 | 0.43 |
| Locomotor activity (a.u.)                                | 20.46±5.50   | 18.92±3.18   | 0.19 | 0.67 |

Table 1: Body mass, oxidative stress and energy parameters, body temperature and locomotor activity during resting and active phases. a.u. = arbitrary unit.

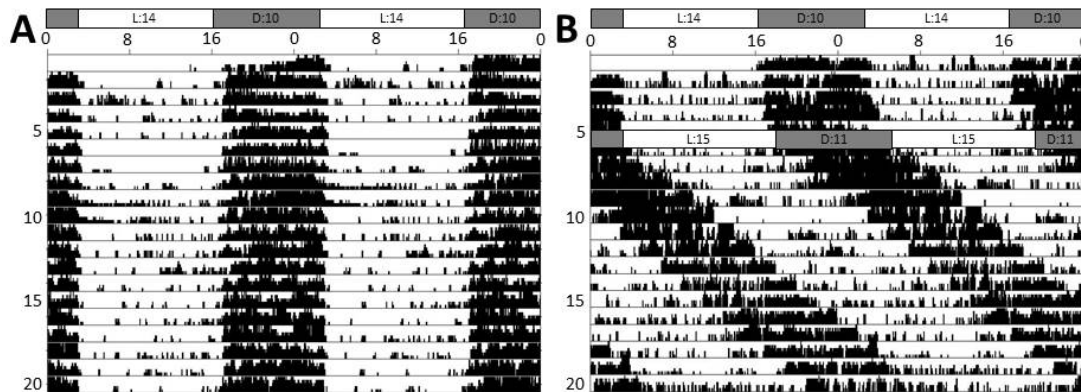

Figure 1: Representative double-plot actograms of individuals of each photoperiodic treatment during the 20 first days of experiment. Before treatment, all individuals were living under light-dark cycles of 24h with 14h of light and 10h of dark (L:D 14:10). The different treatments started on the 6th day of recording. A: T24 group. Mouse lemurs were kept under L:D 14:10. B: T26 group. Mouse lemurs were kept under light-dark cycles of 26h (L:D 15:11).

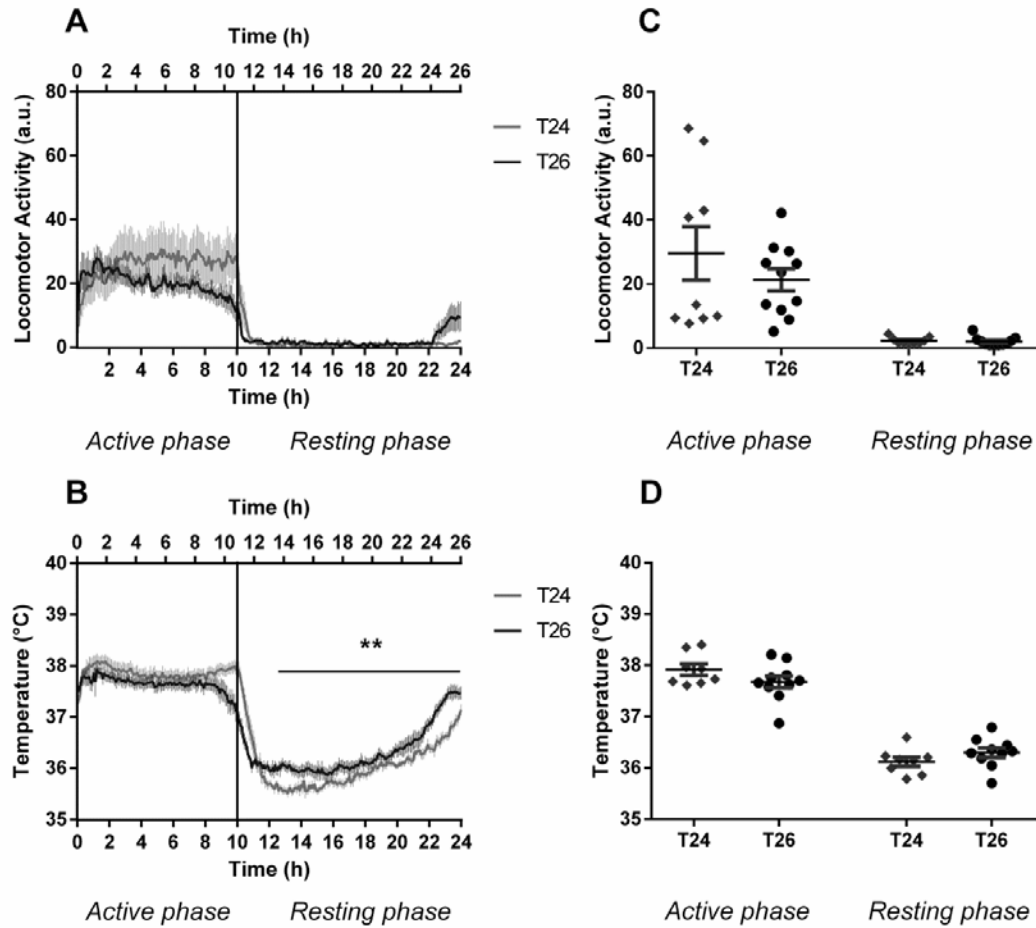

Figure 2: A & B: Daily profiles of locomotor activity and body temperature in T24 and T26. Switch between night and day is represented by the black line. Graphs of T26 animals were scaled to fit the T24 animals' ones. No significant difference in activity levels was observed between two treatments. T26 animals had significant higher Tb during resting time compared to control animals T24 after the thermic fall. C & D: Mean locomotor activity and body temperature during active and resting periods in T24 and T26. '\*\*'=p<0.01.

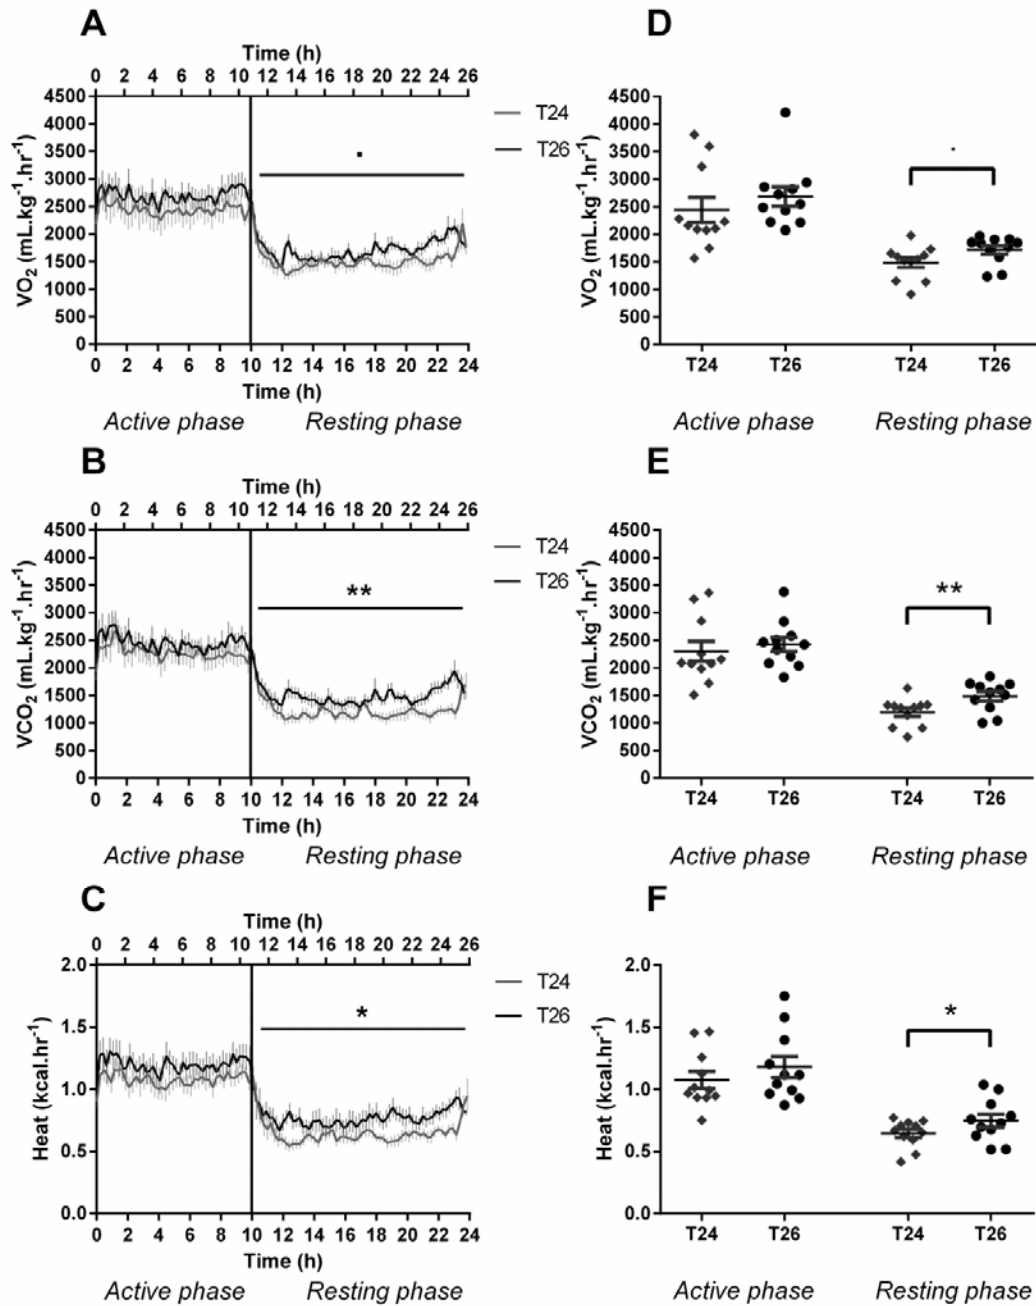

Figure 3: A, B & C: Daily profiles of  $VO_2$ ,  $VCO_2$  and Heat in T24 and T26. Switch between night and day is represented by the black line. Graphs of T26 animals were scaled to fit the T24 animals' ones. D, E & F: Mean  $VO_2$ ,  $VCO_2$  and Heat during active and resting periods in T24 and T26. A tendency suggests a higher  $VO_2$  during the resting phase in T26 and significantly higher  $VCO_2$  and Heat during the resting time were observed in T26. '·'=p<0.1, '\*\*'=p<0.05, '\*\*\*'=p<0.01.



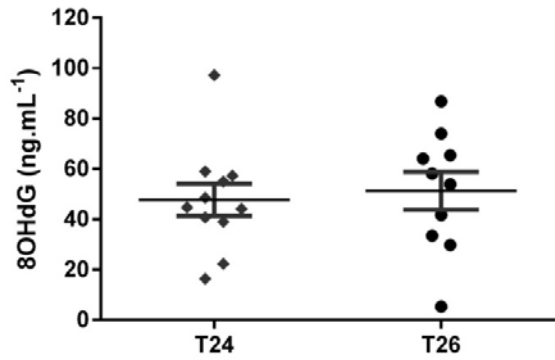

Figure 4: Plasma 8OHdG levels in T24 and T26 (ng.mL<sup>-1</sup>). No significant difference was observed between both treatments.

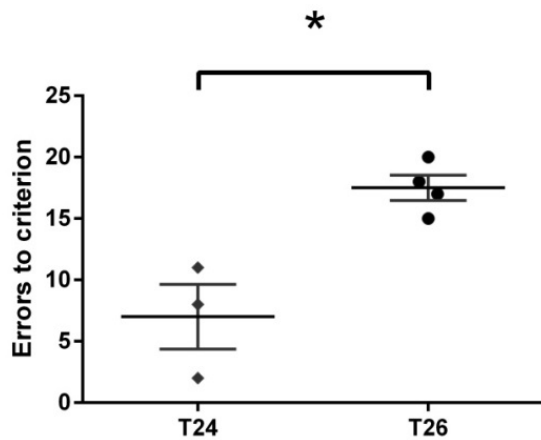

Figure 5: Trials needed before reaching the success criterion to the learning task. T26 individuals needed significantly more trials than T24 individuals to reach the criterion. '\*'=p<0.05

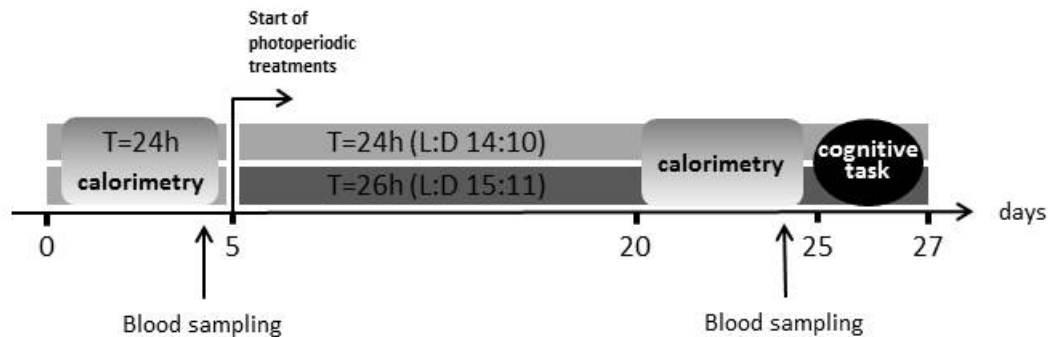

Figure 6: Experimental design. Animals' metabolic activity (calorimetry) was first assessed before treatments during 5 days, period during which pre-treatment blood was also collected. The animals were then separated into two different photoperiodic regimens: in light-dark cycles of 24h (L:D = 14:10) or in light-dark cycles of 26h (L:D = 15:11). After 15 days, metabolic activity was measured again and new blood sampling was collected. The animals then performed a learning task during 2 days.
